1 **Biomarker-based assessment of the muscle maintenance and energy status of**  
2 **anurans from an extremely seasonal semi-arid environment, the Brazilian**  
3 **Caatinga**

4

5 **RUNNING TITLE: Anuran muscle maintenance and energy status**

6

7 Carla Bonetti Madelaire<sup>1\*</sup>, Fernando Ribeiro Gomes<sup>1</sup>, Inna Sokolova<sup>2,3</sup>

8 <sup>1</sup>Departamento de Fisiologia, Instituto de Biociências, Universidade de São Paulo, Rua  
9 do Matão, trav. 14, nº 321, 05508-900, São Paulo, SP, Brazil.

10 <sup>2</sup> Department of Biology, University of North Carolina at Charlotte, 9201 University  
11 City Blvd., Charlotte NC, 28223, USA

12 <sup>3</sup>Marine Biology, Institute for Biological Sciences, University of Rostock, Rostock,  
13 Germany

14 \*Corresponding author: [cmadelaire@yahoo.com.br](mailto:cmadelaire@yahoo.com.br)

15

16 **Key words:** AKT; eIF2 $\alpha$ ; AMPK, Heat shock proteins, cytochrome c oxidase;  
17 aestivation

18

19 **Summary statement**

20 We studied seasonal variation of key metabolic regulators in the muscles of anurans that  
21 experience drastic variation in environmental conditions and differ in the seasonal  
22 activity patterns.

23

## 24 **Abstract**

25 Strongly seasonal environments pose challenges for performance and survival of  
26 animals, especially when resource abundance seasonally fluctuates. We investigated the  
27 seasonal variation of expression of key metabolic biomarkers in the muscles of three  
28 species of anurans from the drastically seasonal Brazilian semi-arid area, Caatinga. The  
29 three studied anuran species (*Rhinella jimi*, *R. granulosa* and *Pleurodema diplolister*)  
30 differ in their seasonal activity patterns. We examined the expression of proteins  
31 regulating energy turnover (AMP-activated protein kinase [AMPK] and protein kinase  
32 B [AKT]), protein synthesis and homeostasis (total and phosphorylated eukaryotic  
33 initiation factor 2 $\alpha$  [eIF2 $\alpha$  and p-eIF2 $\alpha$ ] and chaperone proteins [HSP 60, 70, and 90])  
34 in muscles related to reproduction and locomotion. Cytochrome c oxidase (COX)  
35 activity was also assessed as an index of the muscle aerobic capacity. Our results point  
36 to the importance of metabolic regulators mediating the muscular function during the  
37 drastic seasonal variation. The toads that remain active during the drought appear to  
38 maintain muscles through more energy extensive pathways including elevated protein  
39 synthesis, while the aestivating species employs energy conservation strategy  
40 suppressing protein synthesis, decreasing chaperone expression and increasing  
41 expression of AMPK. All three studied species activate cell survival pathways during  
42 the drought likely to prevent muscle atrophy, and maintain the muscle capacity  
43 throughout the year, despite the resource limitation. These strategies are important  
44 considering the unpredictability of the reproductive event and high demand on muscular  
45 activity during the reproductive season in these amphibians.

## 47 **Introduction**

48 Strongly seasonal environments characterized by large changes in conditions  
49 such as temperature and food availability, pose challenges to the organisms that need to  
50 adjust their functions to survive and complete their life cycles [1, 2]. These  
51 physiological adjustments are dependent on biochemical regulators and cell signaling  
52 pathways that mediate cell survival, ensure cell and organ integrity and prioritize the use  
53 of energy to meet the (often conflicting) needs of survival, growth and reproduction  
54 [1,3]. In vertebrate ectotherms, the skeletal muscle physiology and performance are  
55 directly related to the overall fitness due to the muscles' involvement in courtship,  
56 territorial defense, foraging, escape from predators, mating interactions and migration  
57 [4]. In seasonally fluctuating environments, skeletal muscles can display phenotypic  
58 changes such as atrophy and changes in the fiber number and type during extreme  
59 environmental stress and/or resource limitation [5]. Nevertheless, anuran species that  
60 aestivate display little or no changes in muscle morphology and performance [6,7]  
61 suggesting that species living in arid and semi-arid environments may have molecular  
62 regulatory mechanisms supporting the muscle maintenance and functionality under the  
63 unfavorable environmental conditions.

64 There is an extensive literature on physiological and biochemical adjustments  
65 associated with metabolic depression in anurans from environments with strongly  
66 seasonal and/or unpredictable climatic variation [8,1,2]. However, possible biochemical  
67 adjustments displayed by anurans that remain active during the periods of severe  
68 environmental stress and resource limitation are not well understood. Furthermore,  
69 different locomotor muscles can display distinct reduction in cross-sectional area and  
70 mechanical proprieties in aestivating anuran species and mammalian hibernators,  
71 prioritizing the maintenance of the muscles most relevant to performance [7,9]. Yet, it is  
72 unknown whether seasonal adjustments differ between reproductive and locomotor  
73 muscle in anurans, reflecting preferential investment into the maintenance and  
74 reproductive effort. The possible molecular adjustments of locomotor and reproductive  
75 muscles that help support individual's performance and survival [1] under  
76 environmental stress and resource limitation are not well understood and require further  
77 investigation.

78 Anurans from the Brazilian semi-arid area, the Caatinga, face drastic seasonal  
79 changes in environmental conditions [10-12]. In the Caatinga, anurans depend on  
80 unpredictable heavy rain events (during the short rain season between January and  
81 April) to reproduce. Occasional small showers during the rainy season are not sufficient  
82 to trigger breeding, yet make water and food more easily available to anurans. The rest  
83 of the year is the dry season, characterized by scarce water and food resources. In some  
84 years, there is no rain so that the anurans have no reproductive opportunity until next  
85 rainy season. Anurans from the Caatinga show interspecific variation in behavioral  
86 strategies to survive the drought. Some species such as *Rhinella jimi* and *R. granulosa*  
87 remain active and foraging around humid areas [13]. In contrast, *Pleurodema diplolister*  
88 aestivates and does not feed until the first rains start [12; 14]. Previous studies show that  
89 these anuran species display adjustments in reproductive [13] and immune physiology  
90 [14] throughout the year. During the reproductive period, they display elevated plasma  
91 levels of androgens and higher immunological profile and response compared with the  
92 dry season [14]. During the drought, anurans present lower steroid plasma levels and  
93 lower immune parameters and performance, with the strongest suppression observed in  
94 the aestivating species [13,14]. This stark seasonality of the physiology and behavior in  
95 the anurans from the semi-arid Caatinga suggests a strong selective pressure to regulate  
96 energy metabolism and muscle function to meet the seasonally variable demands of  
97 reproduction, resource acquisition and activity (including the physiological challenge of  
98 metabolic depression during aestivation).

99 To assess the potential mechanisms involved in the regulation and maintenance  
100 of the muscle function in anurans from an extremely seasonal environment of Brazilian  
101 semi-arid Caatinga, we investigated the seasonal variation of expression of key  
102 metabolic regulators in the muscles of males from three species of anurans that differ in  
103 their seasonal activity patterns: *Rhinella jimi* and *R. granulosa* that remain foraging  
104 during drought and *P. diplolister*, which aestivates during this period. We studied  
105 muscles predominantly specialized on reproduction (including the trunk and larynx  
106 muscles used to sustain calling activity [15,16] and the flexor carpi radialis used in  
107 amplexus (grasping) behavior [17]) as well as the muscles predominantly specialized on  
108 locomotion (the plantaris muscle [18]). During dry season, we expected to see an  
109 increase in the pathways that support cell survival and stress response in the muscle,  
110 along with the suppression of the protein synthesis and catabolic pathways [3], and a

111 decrease of muscle aerobic capacity to conserve energy [19], especially in muscles  
112 related to reproduction. The prioritization of the muscles integrity during drought might  
113 ensure the rapid mobilization of these muscles during an unpredictable reproductive  
114 opportunity, and thus would be adaptive. We also anticipated that the aestivating  
115 species would display a more intense downregulation of metabolic functions, such  
116 protein synthesis, compared with the species that remain active year round.

117 To test these hypotheses, we investigated the expression of two protein kinases  
118 that play a key role in the regulation of energy turnover in the muscle (the AMP-  
119 activated protein kinase and protein kinase B) and key proteins involved in the  
120 regulation of the protein synthesis and homeostasis (eukaryotic initiation factor 2 $\alpha$  and  
121 chaperone proteins). The cytochrome c oxidase (COX) activity was assessed as an index  
122 of the mitochondrial aerobic capacity in the tissue [20]. The AMP-activated protein  
123 kinase (AMPK) is an energy sensor of the cell responding to the AMP:ATP ratio  
124 [21,22]. During periods that animals need to save energy, AMPK is activated to regulate  
125 catabolic *versus* anabolic metabolism increasing ATP synthesis and suppressing ATP  
126 consumption [21,22]. Protein kinase B (AKT) plays a central role in metabolism and  
127 cell survival stimulating glucose uptake, glycogen synthesis, lipogenesis and protein  
128 synthesis, and regulating the cell cycle and apoptosis [23]. Eukaryotic initiation factor  
129 2 $\alpha$  regulates protein synthesis and plays a key role in the stress response and  
130 suppression of the ATP-consuming protein synthesis under low energetic budget  
131 scenarios [24]. Heat shock proteins are involved in the general stress response acting as  
132 molecular chaperones and regulating folding of newly synthesized proteins or those  
133 damaged by stressors [25]. Considering their key roles in regulation of the muscle  
134 integrity and function, we expect to see different patterns of activation of the studied  
135 signaling proteins across the season in different species. We also anticipate that the  
136 stress-related pathways involved in energy conservation are upregulated and the aerobic  
137 capacity (measured as the COX activity) is suppressed in anuran muscles during the  
138 drought, when the species that remain active (*R. jimi* and *R. granulosa*) are facing food  
139 and water shortage, and *P. diplolister* is aestivating.

140

## 141 **Materials and Methods**

## 142 **Field collections**

143 Field work was conducted at Fazenda São Miguel near the city of Angicos, in  
144 the State of Rio Grande do Norte, Brazil (5°30'43''S. 36°36'18''W). The area is in the  
145 domain of Brazilian Caatinga, and is characterized by high temperatures. January is the  
146 hottest month with an average temperature of 27.4°C (minimum: 22.8°C, maximum:  
147 32.0°C), and July is the coldest month, with an average temperature of 24.3°C  
148 (minimum: 20.3°C, maximum: 28.3°C) (<http://pt.climate-data.org/location/312354/>).  
149 The annual average temperature from 1950 to 2000 is 26.6 °C (worldclim.org) and there  
150 are two distinct seasons: a rainy season (January to April, 96.4 mm of  
151 precipitation/month) and a dry season (August to November, 2.5 mm of  
152 precipitation/month). The intermediate months of June, July and December can be  
153 considered dry or rainy depending on the extent of drought in the specific year. In  
154 response to the challenges of the dry season, anurans from this locality have adopted  
155 different behavioral strategies. *R. granulosa* and *R. jimi* remain active, foraging close to  
156 humid areas and artificial water sources [14], while *Pleurodema diplolister* aestivate in  
157 the sandy soil under the beds of temporary rivers [12]. For this study, animals were  
158 collected during two different periods in 2015: (A) during the reproductive season  
159 (March, 5–12<sup>th</sup>, 2015); (B) during the dry season (August, 10–16<sup>th</sup>, 2015).

160 During the reproductive period, males of *R. granulosa* (N = 13), *R. jimi* (N = 11)  
161 and *P. diplolister* (N = 16) were located by visual inspection. During the dry period,  
162 males of *R. granulosa* (N = 6), *R. jimi* (N = 7) were found by visual inspection, and *P.*  
163 *diplolister* (N = 8) was found by excavating the known burrowing sites in the sandy  
164 soil. Anurans were collected and individually maintained in plastic containers with  
165 access to water, except the individuals of *P. diplolister* collected during the dry period,  
166 which were maintained in plastic containers filled with humid sand collected in the  
167 location they were found. After two days, animals were weighted (to the nearest 0.01g)  
168 and euthanized with an injection of sodium thiopental solution (25 mg/ml)  
169 (Thiopentax) while kept in an ice-cold dry bath. The muscles (plantaris from the  
170 posterior limb, flexor from anterior limbs, larynx and trunk) were rapidly dissected.  
171 Muscle samples were either immediately frozen in liquid nitrogen (for immunoblotting  
172 analyses), or incubated for 1 to 2 minutes in a cryopreservation medium (10 mM  
173 EGTA, 1.3 mM CaCl<sub>2</sub>, 20 mM imidazole, 20 mM taurine, 49 mM K-MES, 3 mM  
174 K<sub>2</sub>HPO<sub>4</sub>, 9.5 mM MgCl<sub>2</sub>, 5 mM ATP, 15 mM phosphocreatine, 10 mg/ml fatty acid-

175 free BSA, 20% glycerol, pH 7.1) [26] prior to freezing (for COX activity). Tissues were  
176 stored in liquid nitrogen until their transport to the University of North Carolina at  
177 Charlotte (UNC Charlotte), NC, USA on dry ice. At UNC Charlotte the muscle samples  
178 were stored at -80°C until analyses. Fieldwork, maintenance of animals, and transport of  
179 samples were conducted under the approved permissions of Comissão de Ética no Uso  
180 de Animais do IB (CEUA) (Protocol number: 181/2013) and Ministério do Meio  
181 Ambiente, ICMBio, SISBio (License to collect and transport animals: N°29896-1;  
182 Export License number: 15BR017888/DF).

## 183 **Immunoblotting**

184 Muscle samples were homogenized (1:10 w:v) in ice-cold buffer (100 mM Tris,  
185 pH = 7.4, 100 mM NaCl, 1 mM EDTA, 1 mM EGTA, 1% Triton-X, 10% glycerol,  
186 0.1% sodium dodecylsulfate [SDS], 0.5% deoxycholate, 0.5  $\mu\text{g mL}^{-1}$  leupeptin, 0.7  $\mu\text{g}$   
187  $\text{mL}^{-1}$  pepstatin, 40  $\mu\text{g mL}^{-1}$  phenylmethylsulfonyl fluoride [PMSF], and 0.5  $\mu\text{g}$   
188  $\text{mL}^{-1}$  aprotinin), sonicated three times for 10 s each (output 69 Watts; Sonicator 3000,  
189 Misonix Inc.) and centrifuged at  $14000 \times g$  for 5 min at 4°C. The protein content of the  
190 supernatant was measured using Bio-Rad Protein Assay kit (Bio-Rad, Hercules, CA,  
191 USA) with the bovine serum albumin (BSA) as a standard. Protein-containing  
192 supernatant was mixed 3:1 (v:v) with a solution containing 4 parts of 4x Laemmli buffer  
193 and 1 part of 1 M dithiothreitol (DTT), boiled for 5 minutes and frozen in -20°C until  
194 further analysis.

195 Samples (20-50  $\mu\text{g}$  protein per lane, depending on the antibody) were loaded  
196 into 10% polyacrylamide gels and run at 72V for 3 hours at room temperature. After the  
197 run, the gels were incubated for 30 min in 96  $\cdot\text{mmol}\cdot\text{l}^{-1}$  glycine, 12  $\cdot\text{mmol}\cdot\text{l}^{-1}$  Tris and  
198 20% methanol (v/v). The proteins were transferred to a nitrocellulose (for HSP60,  
199 HSP70 and HSP90) or polyvinylidene difluoride (PVDF) membrane (for all other  
200 antibodies) using a Trans-Blot semi-dry cell (Thermo Fisher Scientific Inc., Portsmouth,  
201 NH, USA). Membranes were blocked for one hour in 3% non-fat milk in Tris-buffered  
202 saline, pH 7.6 with 0.1% Tween 20 (TBST) at room temperature, and incubated  
203 overnight at 4°C with the primary antibodies diluted 1:1000 in 5% BSA in TBST. After  
204 washing off the primary antibody with TBST, the membranes were probed with the  
205 polyclonal secondary antibodies conjugated with horseradish peroxidase (Jackson  
206 ImmunoResearch, West Grove, PA, USA) diluted 1:1000 with 3% non-fat milk in



207 TBST for one hour at the room temperature. After washing off the secondary antibody,  
208 the proteins were detected using enhanced chemiluminescence according to the  
209 manufacturer's instructions (Amersham Biosciences, Pierce, Rockford, IL, USA). The  
210 signals were captured on X-ray film and relative optical density of protein bands was  
211 digitalized with an image analysis software (Gel Doc EZ Imager, Bio-Rad, Hercules,  
212 CA, USA) and quantified using Image Lab™ software (Bio-Rad Laboratories Inc.,  
213 Hercules, CA, USA). The loading order of samples in the gels was randomized. The  
214 protein loads per lane were identical for all muscle types and for both studied seasons  
215 except for p-eIF2 $\alpha$  in *R. granulosa* collected during the dry season where the original  
216 load of 30  $\mu$ g per lane did not produce a signal, and 50  $\mu$ g per lane was used. A single  
217 sample (used as an internal control) was loaded on each gel and used to standardize the  
218 expression of the target proteins and account for the potential gel-to-gel signal variation.  
219 The following antibodies were used: AKT (AKT rabbit polyclonal IgG; Cell Signalling  
220 Technology, cat. #9272, Danvers, MA, USA), total AMP-activated protein kinase  
221 (AMPK) (AMPK $\alpha$ , Thr172, Rabbit mAb, Cell Signalling Technology, cat. #2535,  
222 Danvers, MA, USA), phospho-EIF- 2 $\alpha$  (Ser51) (no. 07-760, Millipore, cat. #07-760,  
223 Temecula, CA, USA), EIF-2 $\alpha$  (no. AHO1182, Life Technology, Grand Island, NY,  
224 USA), HSP 60 (HSP60 [insect] polyclonal antibody, Enzo Life Science, cat.#ADI-SPA-  
225 805-D, Farmingdale, NY, USA), HSP 70 (Heat Shock Protein 70 [HSP70] Ab-2, Mouse  
226 Monoclonal Antibody, Thermo Fisher Scientific Inc., cat. # MA3-006, Portsmouth, NH,  
227 USA), HSP 90 (Anti-HSP90 antibody, Rat [monoclonal], cat. #SPA-835, Stressgen  
228 Bioreagents, Ann Arbor, MI, USA). All antibodies produced a single band of the  
229 expected length (S1 Fig).

## 230 **Measurements of cytochrome c oxidase capacity**

231 Cryotubes containing the frozen plantaris or trunk muscles were incubated for  
232 ~ 2 min at 35°C until the cryopreservation medium was completely thawed. The muscle  
233 fibers were immediately washed in ice-cold medium containing 120 mM KCl, 10 mM  
234 NaCl, 2 mM MgCl<sub>2</sub>, 2 mM KH<sub>2</sub>PO<sub>4</sub>, 20 mM HEPES, 1mM EGTA Ca-free, 10 $\mu$ g mL<sup>-1</sup>  
235 PMSF and homogenized in 1-2 ml of the same media with several passes of a Potter-  
236 Elvehjem homogenizer and a loosely fitting Teflon pestle at 200 rpm. The homogenate  
237 was centrifuged at 2000  $\times$  g and 4°C for 8 min to remove cell debris, and the  
238 supernatant containing mitochondria was used to measure activity of cytochrome c  
239 oxidase (COX).



240 COX activity was determined by measuring the oxygen consumption of  
241 mitochondria-containing supernatant at 23°C in the presence of 5 µM antimycin A, 5  
242 mM ascorbate and 10 mM *N,N,N',N'*-Tetramethyl-*p*-phenylenediamine (TMPD) as an  
243 electron donor [27]. Oxygen concentrations were monitored using a fiber optic oxygen  
244 sensor connected to the Microx TX3 oxygen monitor with temperature correction  
245 (Precision Sensing, Dusseldorf, Germany) and Oxy Micro ver. 2.00 software (World  
246 Precision Instruments, Sarasota, FL). A two-point calibration was performed prior to  
247 each measurement. To correct for the potential autooxidation of TMPD, oxygen  
248 consumption was measured after addition of 25 mM KCN to inhibit COX, and the  
249 difference in the oxygen consumption rates in the presence and absence of KCN was  
250 used to calculate COX activity. Concentrations of oxygen in the respiration chamber  
251 were monitored using Logger Pro 3.2 with a Vernier LabPro interface (Vernier  
252 Software and Technology, Beaverton, OR). Protein concentrations in mitochondrial  
253 isolates were measured using a Bio-Rad protein assay (Bio-Rad, Hercules, CA, USA) in  
254 the presence of 0.1% Triton X-100 to solubilize mitochondrial membranes, with BSA as  
255 the standard. COX activity was expressed as µmol O<sub>2</sub> min<sup>-1</sup> g<sup>-1</sup> mitochondrial protein.  
256 Each biological replicate represented an individual isolate obtained from the pooled  
257 tissues of 2–3 animals.

## 258 **Statistical analysis**

259 Variables were log<sub>10</sub> transformed to improve normality. For the immunoblotting  
260 results, a two-way ANOVA was used to compare the effects of the season, gel and their  
261 interaction on protein expression (measured as a densitometric signal). When the effects  
262 of the gel and/or gel x season interactions were not significant, a one-way ANOVA was  
263 used to test for the effect of the season. To compare different muscles within a season, a  
264 one-way ANOVA was used followed by Bonferroni post-hoc test. For COX activity, a  
265 two-way ANOVA was used to compare the effects of species and muscles (COX ~  
266 species + muscle); and species and season in each muscle (COX<sub>muscle</sub> ~ species +  
267 season). Assumptions of the ANOVA and t test (normality and equal variance) were  
268 met and statistical significance was set at P < 0.05. All tests were run in R software,  
269 version 2.10.0 (R Development Core Team, 2010). Data are shown as means ± the  
270 standard error of the mean (S.E.M).

## 271 **Results**

## 272 Metabolic signaling

273 Total AMPK showed higher expression during the dry period compared to the  
 274 reproductive period in all studied muscle types of *R. jimi* (larynx -  $F_{1,6} = 0.25$ ,  $P =$   
 275  $0.001$ ; trunk -  $F_{1,12} = 0.68$ ,  $P = 0.001$ ; flexor -  $F_{1,9} = 0.13$ ,  $P = 0.04$ ; plantaris -  $F_{1,12} =$   
 276  $0.65$ ,  $P = 0.003$ ) (Fig 1). A similar trend was seen in *P. diplolister*, albeit it was only  
 277 significant in the plantaris muscle ( $F_{1,10} = 0.14$ ,  $P = 0.002$ ) (Fig 1C). *R. granulosa*  
 278 displayed similar AMPK expression levels across the two studied seasons in all muscle  
 279 types (Flexor:  $F_{1,8} = 2.74$ ,  $P = 0.14$ ; trunk:  $F_{1,12} = 0.84$ ,  $P = 0.38$ ; plantaris:  $F_{1,12} = 0.34$   
 280  $P = 0.57$ ). When compared within the same season, AMPK levels in different muscle  
 281 types were similar within *R. jimi* and *R. granulosa* ( $P > 0.05$ , Table 1). In *P. diplolister*,  
 282 AMPK levels were similar in different muscle types during the dry period (Table 1).  
 283 During the reproductive period, trunk muscles of *P. diplolister* showed higher AMPK  
 284 expression compared with other muscles ( $F_{2,20} = 4.23$ ,  $P = 0.03$ , Bonferroni  $P = 0.03$ )  
 285 (S2 Fig).

286 **Fig 1. Expression of AMPK and AKT in different muscle types of *R. granulosa*, *R.***  
 287 ***jimi*, and *P. diplolister* during reproductive and dry periods.**  $n = 3-10$ . AMPK  
 288 expression is shown for (A) larynx, (B) trunk, (C) plantaris, and (D) flexor muscles.  
 289 AKT expression is shown for (E) larynx, (F) trunk, (G) plantaris, and (H) flexor  
 290 muscles. Asterisks indicate significant difference between the reproductive and dry  
 291 periods ( $P < 0.05$ ). ND - not determined because of the lack of samples.

292

293 **Table 1. ANOVA: comparison of protein expression in different muscles within a**  
 294 **season. F ratios (with the degrees of freedom and the error shown as a subscript),**  
 295 **P values are given, and significant effects ( $P < 0.05$ ) are highlighted in bold.**  
 296 **Missing analysis are either protein detection below limit or lack of samples.**

|      | <i>Rhinella jimi</i>                                      | <i>Rhinella granulosa</i>     | <i>Pleurodema diplolister</i> |
|------|-----------------------------------------------------------|-------------------------------|-------------------------------|
|      | Reproductive                                              | Reproductive                  | Reproductive                  |
| AKT  | <b><math>F_{3,13} = 3.69</math> <math>P = 0.04</math></b> | $F_{3,13} = 3.35$ $P = 0.053$ | $F_{3,11} = 0.91$ $P = 0.47$  |
|      | Dry                                                       | Dry                           | Dry                           |
|      | $F_{3,6} = 4.56$ $P = 0.06$                               | $F_{3,5} = 0.34$ $P = 0.80$   | $F_{3,10} = 1.39$ $P = 0.30$  |
| AMPK | Reproductive                                              | Reproductive                  | Reproductive                  |

297

|                                                               |                                                |                                                |                                                |
|---------------------------------------------------------------|------------------------------------------------|------------------------------------------------|------------------------------------------------|
|                                                               | $F_{3,18} = 2.44$ P = 0.10                     | $F_{3,13} = 1.70$ P = 0.20                     | <b><math>F_{3,17} = 3.42</math> P = 0.04</b>   |
|                                                               | <b>Dry</b>                                     | <b>Dry</b>                                     | <b>Dry</b>                                     |
|                                                               | $F_{3,18} = 2.35$ P = 0.11                     | $F_{2,7} = 0.72$ P = 0.52                      | <b><math>F_{1,10} = 0.14</math>, P = 0.002</b> |
|                                                               | <b>Reproductive</b>                            | <b>Reproductive</b>                            | <b>Reproductive</b>                            |
| <b>p-eIF2<math>\alpha</math></b>                              | $F_{3,14} = 2.21$ P = 0.13                     | $F_{3,6} = 0.87$ P = 0.51                      | $F_{3,15} = 1.59$ P = 0.24                     |
|                                                               | <b>Dry</b>                                     | <b>Dry</b>                                     | <b>Dry</b>                                     |
|                                                               | $F_{3,14} = 0.74$ P = 0.55                     | -                                              | <b><math>F_{3,6} = 11.53</math> P = 0.01</b>   |
|                                                               | <b>Reproductive</b>                            | <b>Reproductive</b>                            | <b>Reproductive</b>                            |
| <b>eIF2<math>\alpha</math></b>                                | <b><math>F_{3,15} = 11.18</math> P = 0.001</b> | <b><math>F_{3,18} = 23.82</math> P = 0.001</b> | $F_{3,19} = 2.89$ P = 0.06                     |
|                                                               | <b>Dry</b>                                     | <b>Dry</b>                                     | <b>Dry</b>                                     |
|                                                               | <b><math>F_{3,5} = 26.67</math> P = 0.002</b>  | $F_{3,6} = 1.19$ P = 0.39                      | $F_{3,5} = 1.02$ P = 0.46                      |
|                                                               | <b>Reproductive</b>                            | <b>Reproductive</b>                            | <b>Reproductive</b>                            |
| <b>p-eIF2<math>\alpha</math>/<br/>eIF2<math>\alpha</math></b> | $F_{3,10} = 1.94$ P = 0.19                     | $F_{3,5} = 0.17$ P = 0.92                      | $F_{3,12} = 1.28$ P = 0.32                     |
|                                                               | <b>Dry</b>                                     | <b>Dry</b>                                     | <b>Dry</b>                                     |
|                                                               | <b><math>F_{3,6} = 11.30</math> P = 0.007</b>  | -                                              | $F_{3,4} = 3.02$ P = 0.16                      |
|                                                               | <b>Reproductive</b>                            | <b>Reproductive</b>                            | <b>Reproductive</b>                            |
| <b>HSP60</b>                                                  | <b><math>F_{3,22} = 9.44</math> P = 0.001</b>  | <b><math>F_{3,15} = 3.70</math> P = 0.04</b>   | $F_{2,13} = 1.46$ P = 0.27                     |
|                                                               | <b>Dry</b>                                     | <b>Dry</b>                                     | <b>Dry</b>                                     |
|                                                               | <b><math>F_{3,12} = 13.90</math> P = 0.001</b> | $F_{2,6} = 0.002$ P = 0.99                     | $F_{3,5} = 2.65$ P = 0.16                      |
|                                                               | <b>Reproductive</b>                            | <b>Reproductive</b>                            | <b>Reproductive</b>                            |
| <b>HSP70</b>                                                  | <b><math>F_{3,16} = 10.36</math> P = 0.001</b> | $F_{3,9} = 0.47$ P = 0.71                      | $F_{2,25} = 0.92$ P = 0.41                     |
|                                                               | <b>Dry</b>                                     | <b>Dry</b>                                     | <b>Dry</b>                                     |
|                                                               | $F_{3,6} = 0.90$ P = 0.50                      | $F_{3,8} = 1.16$ P = 0.38                      | $F_{3,8} = 2.63$ P = 0.12                      |
|                                                               | <b>Reproductive</b>                            | <b>Reproductive</b>                            | <b>Reproductive</b>                            |
| <b>HSP90</b>                                                  | <b><math>F_{3,12} = 28.07</math> P = 0.001</b> | -                                              | <b><math>F_{2,8} = 40.87</math> P = 0.001</b>  |
|                                                               | <b>Dry</b>                                     | <b>Dry</b>                                     | <b>Dry</b>                                     |
|                                                               | $F_{3,14} = 1.45$ P = 0.27                     | -                                              | $F_{1,4} = 0.003$ P = 0.96                     |

298

299 Expression of the protein kinase B (AKT) tended to be higher during the dry  
300 period in all studied species and muscle types (except flexor for all species and the  
301 larynx of *R. jimi*; Fig 1E-H). This trend was significant in the larynx muscles from *P.*  
302 *diploister* ( $F_{1,8} = 0.58$ , P = 0.001), the trunk muscles from *R. granulosa* and *P.*  
303 *diploister* ( $F_{1,7} = 1.55$ , P = 0.002;  $F_{1,6} = 0.79$ , P = 0.006), and the plantaris muscle from  
304 all three studied species (*R. granulosa* -  $F_{1,7} = 0.24$ , P = 0.03; *R. jimi* -  $F_{1,6} = 0.25$ , P =  
305 0.001; *P. diploister* -  $F_{1,11} = 1.21$ , P = 0.002) (Fig 1E-G). There were no significant  
306 differences of AKT expression between seasons in the flexor muscle in the three studied  
307 species (*R. granulosa* -  $F_{1,6} = 3.57$ , P = 0.11; *R. jimi* -  $F_{1,8} = 0.19$ , P = 0.68; *P.*

308 *diplolister* -  $F_{1,4} = 5.58$ ,  $P = 0.08$ ). AKT levels were the same across different muscle  
309 types when compared within the same season in all three studied species ( $P > 0.05$ ,  
310 Table 1).

## 311 Protein homeostasis

312 Total expression levels of the eukaryotic initiation factor 2 $\alpha$  (eIF2 $\alpha$ ) were lower  
313 during the dry period than in the reproductive period in the larynx and flexor muscles  
314 from *P. diplolister* ( $F_{1,7} = 0.079$ ,  $P = 0.016$ ;  $F_{1,4} = 0.110$ ,  $P = 0.04$ ) (Fig 2A-D), and in  
315 the trunk and plantaris muscles from *R. granulosa* ( $F_{1,14} = 1.06$ ,  $P = 0.002$ ;  $F_{1,12} = 0.132$ ,  
316  $P = 0.02$ ) (Fig 2A-D). In all other muscle types (including the trunk and plantaris of *P.*  
317 *diplolister*, the larynx and flexor of *R. granulosa*, and all muscle types of *R. jimi*),  
318 season had no significant effect on eIF2 $\alpha$  expression ( $P > 0.05$ ). In *R. granulosa*, during  
319 the dry period, the flexor muscle had the highest levels of total eIF2 $\alpha$  when compare  
320 with the other studied muscles types; during reproductive period, the flexor and trunk  
321 muscles had elevated levels of eIF2 $\alpha$  compared larynx and plantaris (Table 1; S3A and  
322 B Fig; Bonferroni  $P = 0.001$  and  $0.028$ , respectively). For *R. jimi* collected in the  
323 reproductive period, trunk and plantaris muscles showed lower total eIF2 $\alpha$  expression  
324 compared with the larynx and flexor (Table 1; S3C Fig; Bonferroni  $P = 0.042$ ). No  
325 differences in total eIF2 $\alpha$  levels were found between different muscle types of *R. jimi*  
326 during the dry period, or of *P. diplolister* during the dry and reproductive periods (Table  
327 1).

328 **Fig. 2. Relative intensity of eIF2 $\alpha$  protein levels (A) larynx, (B) trunk, (C) flexor**  
329 **and (D) plantaris; phosphorylate eIF2 $\alpha$  protein levels (E) larynx, (F) trunk, (G)**  
330 **flexor and (H) plantaris; phosphorylate eIF2 $\alpha$ / eIF2 $\alpha$  ratio (I) larynx, (J) trunk,**  
331 **(K) flexor and (L) plantaris in *R. granulosa*, *R. jimi*, and *P. diplolister* during**  
332 **reproductive and dry period. n = 3–10, except when it is indicated. Zero indicates**  
333 **protein levels below the detection limit. ND - not determined because of the lack of**  
334 **samples. Asterisks indicate significant difference between reproductive and dry periods**  
335 **( $P < 0.05$ ).**

336

337 Phosphorylated eukaryotic initiation factor 2- $\alpha$  (p-eIF2 $\alpha$ ) showed lower  
338 expression during the dry period in trunk, flexor and plantaris muscles ( $F_{1,13} = 0.94$ ,  $P =$   
339  $0.003$ ;  $F_{1,9} = 0.23$ ,  $P = 0.006$ ;  $F_{1,10} = 0.47$ ,  $P = 0.004$ , respectively) (Fig 2E-H), but not in

340 the larynx from *R. jimi* ( $F_{1,4} = 3.52$ ,  $P = 0.13$ ). In contrast, p-eIF2 $\alpha$  levels were elevated  
341 in the muscles of *P. diplolister* during the dry period compared to the reproductive one  
342 (Fig 2E-H), and this trend was significant in the trunk ( $F_{1,6} = 0.30$ ,  $P = 0.003$ ) and  
343 marginally significant in the flexor muscle ( $F_{1,1} = 83.38$   $P = 0.069$ ) but not in the larynx  
344 ( $F_{1,8} = 0.673$ ,  $P = 0.436$ ) or plantaris ( $F_{1,12} = 0.506$   $P = 0.49$ ). Notably, p-eIF2 $\alpha$  levels  
345 were below the detection limit in all muscles from *R. granulosa* during the dry period  
346 (at 50  $\mu$ g of total protein per lane) (Fig 2E-H). Comparisons between different muscle  
347 types within each species and each study season showed similar p-eIF2 $\alpha$  expression  
348 among different muscle types in *R. jimi* and *R. granulosa* during the dry and  
349 reproductive periods, and in *P. diplolister* during the reproductive period (Table 1).  
350 However, during the dry period the trunk muscle of *P. diplolister* had significantly  
351 higher levels than flexor and plantaris, and levels of p-eIF2 $\alpha$  in the plantaris tissue was  
352 below that in all other studied muscle types (Table 1, S3D Fig).

353 The ratio of p-eIF2 $\alpha$  to total eIF2 $\alpha$  levels was lower during the dry period in all  
354 muscle types of *R. granulosa* (reflecting the non-detectable levels of p-eIF2 $\alpha$  during the  
355 dry period) and in the flexor and plantaris muscles *R. jimi* ( $F_{1,3} = 0.518$ ,  $P = 0.02$ ;  $F_{1,4} =$   
356  $0.257$ ,  $P = 0.034$ ), but not *P. diplolister* ( $P > 0.05$ ) (Fig 2I-L). The ratio of p-eIF2 $\alpha$  to  
357 total eIF2 $\alpha$  did not significantly vary among the different muscle types when compared  
358 within the same season in *P. diplolister* and *R. granulosa* (Table 1). In *R. jimi* during the  
359 dry period, larynx muscle showed higher p-eIF2 $\alpha$ / eIF2 $\alpha$  ratio when compared to the  
360 other muscles (S3E Fig; Bonferroni  $P = 0.05$ ); this difference was not significant during  
361 the reproductive period (Table 1).

362 Heat shock protein 60 (HSP60) showed lower expression during the dry period  
363 in the flexor from *R. jimi* ( $F_{1,11} = 1.12$ ,  $P = 0.001$ ), and in the larynx and trunk of *P.*  
364 *dipolister* ( $F_{1,7} = 0.33$ ,  $P = 0.047$ ;  $F_{1,8} = 0.11$ ,  $P = 0.008$ ) (Fig 3A-D). In all other studied  
365 tissue/species combinations, no significant differences in HSP60 levels were found  
366 between the reproductive and dry periods ( $P > 0.05$ ). Notably, the trunk muscles of *R.*  
367 *jimi* and *R. granulosa* had lower HSP60 levels compared to other muscle types in the  
368 reproductive season (Table 1; S4A and C Fig). During the dry period, HSP60 levels in  
369 the trunk muscle of *R. jimi* were similar to that in the larynx and flexor while HSP60  
370 levels in the plantaris muscle were higher than in the larynx and flexor (Table 1;  
371 Bonferroni  $P = 0.052$ ) (S4B Fig). In *P. diplolister*, HSP60 were similar among different  
372 muscle types within each respective studied season ( $P > 0.05$ ).

373 **Fig 3. Relative intensity of HSP 60 protein levels in (A) larynx, (B) trunk, (C)**  
374 **flexor, (D) plantaris, HSP 70 protein levels in (E) larynx, (F) trunk, (G) flexor, (H)**  
375 **plantaris, HSP 90 protein levels in (I) larynx, (J) trunk, (K) flexor and (L)**  
376 **plantaris of *R. granulosa*, *R. jimi*, and *P. diplolister* during reproductive and dry**  
377 **periods. Data are means  $\pm$  S.E.M., n = 3–11, except when indicated. ND indicates not**  
378 **determined because of the lack of samples. Zero indicates protein levels below the**  
379 **detection limit of the method employed. ND - not determined because of the lack of**  
380 **samples. Asterisks indicate significant difference between reproductive and dry periods**  
381 **(P < 0.05).**

382

383 Heat shock protein 70 (HSP70) showed lower expression during the dry period  
384 compared to the reproductive season in the larynx and trunk of *P. diplolister* ( $F_{1,9} =$   
385  $0.42$ ,  $P = 0.03$ ;  $F_{1,13} = 0.191$ ,  $P = 0.02$ ) (Fig 3E-H). Similarly, the trunk muscles of *R.*  
386 *jimi* had lower HSP70 levels during dry period compared to the reproductive one ( $F_{1,7} =$   
387  $0.19$ ,  $P = 0.02$ ). The flexor muscle of *R. jimi* showed higher HSP70 expression during  
388 the dry period ( $F_{1,6} = 10.27$ ,  $P = 0.019$ ), while larynx displayed similar HSP70  
389 expression along the year ( $F_{1,5} = 2.05$ ,  $P = 0.21$ ) (Fig 3E-H). *R. granulosa*'s trunk  
390 muscles (but not the plantaris, flexor or larynx) showed higher HSP70 levels during the  
391 dry period compared to the reproductive season ( $F_{1,8} = 8.35$ ,  $P = 0.02$ ) (Fig 3E-H).  
392 Within each species and study season, only *R. jimi* showed differences in HSP70 levels  
393 among different muscle types during the reproductive season, with the highest levels in  
394 the trunk and the lowest levels in the plantaris muscle (Table 1; S4D Fig; Bonferroni P  
395 = 0.006).

396 Heat shock protein 90 (HSP 90) showed lower expression during the dry period  
397 compared with the reproductive period in the larynx and flexor muscles of *R. jimi* ( $F_{1,8}$   
398 =  $0.27$ ,  $P = 0.007$ ;  $F_{1,11} = 0.37$ ,  $P = 0.001$ ) and in the trunk muscles from *P. diplolister*  
399 ( $F_{1,1} = 1.02$ ,  $P = 0.03$ ;  $F_{1,6} = 0.44$ ,  $P = 0.042$ ) (Fig 3I-L). In contrast, in the plantaris  
400 muscle of *R. jimi* lower levels of HSP90 were found during the reproductive period  
401 compared with the dry one ( $F_{1,2} = 0.13$   $P = 0.045$ ). HSP90 could not be detected in *R.*  
402 *granulosa* due to the lack of the cross-reactivity of the antibody. Comparison among  
403 different muscle types within the same season showed elevated HSP90 levels in the  
404 larynx and flexor compared to the trunk and plantaris of *R. jimi* during the reproductive  
405 period (Bonferroni P = 0.013), and in the larynx of *P. diplolister* compared to all other



406 tissue types, also during the reproductive period (Bonferroni  $P = 0.007$ ) (S4E and F  
407 Fig, Table 1). In all other studied species/season combinations, no significant  
408 differences in HSP90 levels were found between different muscle types ( $P > 0.05$ ).

## 409 **Aerobic capacity**

410 Activity of cytochrome c oxidase (COX), which can serve as a marker of the  
411 mitochondrial density and thus aerobic capacity of the tissue, was higher in the trunk  
412 and plantaris muscles of *R. jimi* compared to *R. granulosa* and *P. diplolister* ( $F_{2,22} =$   
413  $7.000$ ,  $P = 0.005$  and  $F_{2,43} = 9.616$ ,  $P = 0.001$ , for the dry and the reproductive period  
414 respectively) (Fig 4). Notably, COX activity tended to be lower in the trunk muscle than  
415 in the plantaris muscle across the species during the dry period (by 40-45% in *R.*  
416 *granulosa* and *P. diplolister* and by 68% in *R. jimi*), although this difference was  
417 significant only for *R. jimi* ( $F_{1,22} = 5.334$ ,  $P = 0.03$ ). Comparing within species, COX  
418 activity was marginally higher during reproductive season than during the dry season in  
419 the trunk *R. granulosa* ( $t = 2.194$ ,  $df = 5$ ,  $P = 0.07$ ), but not in the plantaris ( $t = 0.132$ ,  $df$   
420  $= 1$ ,  $P = 0.90$ ). *Rhinella jimi* and *P. diplolister* did not display differences in the COX  
421 activity between seasons ( $P > 0.05$ ).

422 **Fig 4. Activity of cytochrome c oxidase (COX) in trunk (A) and plantaris (B)**  
423 **muscles during reproductive and dry periods in *R. granulosa*, *R. jimi*, and *P.***  
424 ***diplolister*.**  $n = 3-11$ , except when indicated. Asterisk indicates significant difference  
425 between periods ( $P < 0.05$ ).

426

## 427 **Discussion**

428 Our results indicate the importance of metabolic regulators mediating the muscle  
429 maintenance and function during the drastic seasonal variation faced by the Caatinga  
430 anurans. The toads that remain active during the dry period appear to maintain muscles  
431 through more energy extensive pathways including elevated protein synthesis, while the  
432 aestivating frogs employs energy conservation strategy that involves suppression of  
433 protein synthesis, decrease in the chaperone expression and higher total expression of  
434 AMPK. These adjustments are consistent with their lower metabolic rates [12] and need  
435 for saving energy during aestivation. All three studied species activate cell survival  
436 pathways during the dry period in the muscles likely to prevent muscle atrophy. All



437 three studied species thereby maintain the muscle capacity throughout the year, despite  
438 the resource limitation. These strategies are important considering the unpredictability  
439 of the reproductive event and the need to rapidly engage the muscular activity in  
440 response to the rain event triggering reproduction.

## 441 **Cellular survival and protein synthesis pathways in the** 442 **muscle**

443 The protein kinase B (AKT) is an important signaling protein involved in  
444 cellular survival pathways in the muscle [28]. AKT expression was elevated during the  
445 dry period in the trunk and plantaris muscles from all studied species and in the larynx  
446 in the aestivating species, but not in flexor. The most pronounced increases of AKT was  
447 in the aestivating species, *P. diplolister*. Possibly, activation of AKT in the flexor may  
448 occur later as the dry season progresses (similar to the delayed activation of the AKT  
449 pathway in some skeletal muscle types of a hibernating mammal *Marmota flaviventris*  
450 [29]; this hypothesis remains to be tested with regard to the Caatinga anurans. Similarly  
451 to our present results, elevated expression of AKT was reported in the foot muscle and  
452 hepatopancreas of estivating snails [30] and in the liver of a frog *Rana sylvatica*  
453 exposed to freezing [31]. AKT promotes cell survival, downregulates pro-apoptotic  
454 factors [32,30,33,31,34], and activates the cascade involved in cell cycle arrest and  
455 quiescence [35]. Therefore, the upregulation of AKT in the Caatinga anurans during the  
456 dry period could be important for preventing the muscle atrophy when resources are  
457 limited. Notably, the upregulation of AKT during the dry period goes hand-in-  
458 hand with an increase of the phosphorylated form of eIF2 $\alpha$  (p-eIF2 $\alpha$ ) in the trunk  
459 muscle and/or a decrease of the total eIF2 $\alpha$  in the larynx and flexor muscles of the  
460 estivating species, *P. diplolister*. This agrees with the earlier findings showing that  
461 phosphorylated eIF2 $\alpha$  can facilitate AKT activation thereby promoting cell survival  
462 [36]. Furthermore, the eIF2 $\alpha$  is an essential initiation factor in protein synthesis which  
463 controls the translation rates and becomes inactivated by phosphorylation [37]. Thus,  
464 low levels of eIF2 $\alpha$  and/or elevated expression of p-eIF2 $\alpha$  indicate suppression of the  
465 protein synthesis in the muscles of *P. diplolister* during aestivation. The stable level of  
466 eIF2 $\alpha$  and p-eIF2 $\alpha$  in the other studied *P. diplolister* muscles might indicate that the  
467 regulation of the protein synthesis in these tissues might be dependent on alternative  
468 mechanisms such as control of the translation elongation [38] or ribosome

469 (dis)assembly [39]. Suppression of the protein synthesis is a common energy-saving  
470 mechanism in estivating species [38] and has been observed in desert amphibians  
471 *Neobatrachus centralis* [40] and in estivating snails *Otala lactea* [41,42]. Earlier studies  
472 on estivating frogs (*Cyclorana alboguttata*) showed that muscles are protected against  
473 atrophy during prolonged (9 months) estivation with no decline in muscle mass, cross-  
474 sectional area or fiber number [7]. Our study in *P. diplolister* suggests a possible  
475 mechanism for this protection involving the coordinated suppression of the protein  
476 synthesis to conserve energy reserves and activation of the cell survival pathways to  
477 prevent loss of the muscle cells.

478         The protein synthesis was activated during the dry period in the muscles of *R.*  
479 *jimi* and *R. granulosa* (two species that remain active throughout the year) as indicated  
480 by a decline in the amount of inactive p-eIF2 $\alpha$  in all studied muscle types, but not in the  
481 aestivating species *P. diplolister*. This was especially notable in *R. granulosa* where p-  
482 eIF2 $\alpha$  levels were below the detection limits of immunoblotting during the dry period.  
483 The maintenance of foraging activity of *Rhinella* species during dry period might allow  
484 higher protein synthesis and activation of the cell survival pathways, potentially helping  
485 to build the muscle mass in preparation for the reproductive period in the two toad  
486 species. The maintenance of the muscle mass during the dry period is important for the  
487 Caatinga anurans, which start reproduction immediately after fairly unpredictable  
488 rainfall events [13]. The reproductive behavior involves strenuous calling activity  
489 (which engages the trunk muscles) in all three studied species [12]. In *P. diplolister*,  
490 males must also energetically beat legs to build foam nests for eggs deposition [12].  
491 Despite some variation in the AKT, eIF2 $\alpha$  and p-eIF2 $\alpha$  levels among the muscle types,  
492 the seasonal patterns of expression of these proteins were generally consistent in  
493 different muscles within each studied species. These results indicate that the molecular  
494 mechanisms of the muscle maintenance during the resource-limited dry season are  
495 similar in the locomotor muscles (i.e. plantaris) and the reproductively-related muscles  
496 (such as trunk, flexor and larynx).

## 497 **Indices of energy status**

498         Elevated expression of AMPK in muscle tissues (indicative of the cellular  
499 energy stress) was observed during the dry period in all muscles of *R. jimi* and in  
500 plantaris muscle of *P. diplolister*. An increase in AMPK levels is common during the

501 resource- and energy-limited periods in many organisms including hibernating  
502 mammals [43,44] and frogs exposed to hypothermia, hypoxia, freezing, dehydration or  
503 anoxia [45,46,44]. Furthermore, AMPK suppresses energy-demanding metabolic  
504 processes [47,22] and induces cell cycle arrest [12,22,44], which also contributes to  
505 energy savings. The reasons for the differences in AMPK response between the two  
506 non-estivating active species are not known. Furthermore, the expression of  
507 phosphorylated and total AMPK might not always be in the same direction which limits  
508 our conclusions on the potential changes in the active form of this protein (since the  
509 phosphorylated form of AMPK could not be measured in our present study due to the  
510 lack of antibody cross-reactivity with the anuran protein). Different responses regarding  
511 AMPK activation in anuran species submitted to the same freezing condition has been  
512 reported in *Rana perezi* and *Rana sylvatica* [45,46]. Additionally, during reproductive  
513 period, AMPK expression was particularly elevated in trunk of *P. diplolister* compared  
514 to other muscle types, which might indicate a metabolic stress due to high energy  
515 demand of the trunk muscles due to calling activity [48,49,50]. However, this  
516 hypothesis remains to be tested.

517 COX activity (indicative of the mitochondrial density) was considerably higher  
518 in the muscles of the largest of the three studied species (*R. jimi*) compared to *P.*  
519 *diploister* or *R. granulosa*. COX activity was especially high in the plantaris muscle of  
520 *R. jimi*, which is consistent with higher locomotor capacity of large toads from *Rhinella*  
521 *marina* group of species [51]. Generally, the mitochondrial COX capacity of the frogs'  
522 muscles was maintained at the same level in the reproductive and dry period except for  
523 a small but significant decline in the COX activity in the trunk muscle of *R. granulosa*  
524 during the dry period. This indicates that the aerobic capacity of the locomotor as well  
525 as the reproductive muscles is maintained throughout the year despite the energy and  
526 resource limitation in the dry season.

## 527 **Expression of molecular chaperones**

528 Molecular chaperones involved in the folding of nascent and damaged proteins  
529 (including a mitochondrial HSP60 and cytosolic HSP70 and HSP90) were expressed at  
530 lower levels in the muscles of the estivating *P. diplolister* during the dry period. A  
531 decrease in HSP expression in aestivating frogs goes hand-in-hand with the suppressed  
532 protein synthesis in the muscles and may reflect lower protein turnover rates during

533 aestivation [41,52]. Similarly, other aestivating species such as land snails also decrease  
534 HSP expression during quiescence [53, 54] and sharply increase it during arousal [55].

535         The higher expression of HSPs in the muscles trunk of *P. diplolister* during the  
536 reproductive period might be attributed to the stress caused by the exercise from calling  
537 behavior and high steroid receptor expression levels [56,57,58]. Calling is a highly  
538 energetic demanding aerobic exercise for anuran males [59,48], and calling effort is  
539 positively correlated with plasma levels of androgens and corticosterone [60, 65, 66].  
540 Furthermore, anurans show increased expression of steroid hormones during  
541 reproductive season [65,67], which are associated with HSP in the inactive state  
542 [68,69,70]. Thus, elevated expression of HSPs during the reproductive season in *P.*  
543 *diploister* might also reflect the high levels of steroids during this period. However, the  
544 pattern of HSP levels in the muscles of *R. jimi* or *R. granulosa* males are less clear,  
545 considering they also display high steroid levels during the reproductive season.  
546 Overall, HSP levels of in the muscle tissues in the two anurans species that are year-  
547 round active showed relatively little variation and no consistent pattern of seasonal  
548 change between different muscle types. This indicates the lack of strong unfolded  
549 protein response and thus maintenance of the protein homeostasis during the period of  
550 reproductive activity as well as during times of resource limitation in these species.

## 551 **Conclusions and perspectives**

552         The differential responses of the cell signaling and stress response pathways  
553 found in the muscles of the three studied species of desert anurans reflect differences in  
554 their life habit and activity levels as well as the common need to maintain the muscle  
555 capacity in an extremely seasonal environment of the Caatinga. Activation of the cell  
556 survival pathways is the most consistent response in the muscles of all three studied  
557 species during the dry period likely playing a role in preventing muscle atrophy during  
558 the resource limitation. Expression of the regulators of protein homeostasis (including  
559 chaperones and regulators of the protein synthesis) reflect different levels of resource  
560 limitation, so that the less resource-limited active species upregulate protein synthesis  
561 and maintain high levels of chaperones during the dry periods in the muscle while a  
562 severely resource-limited aestivating species shuts down the protein synthesis to  
563 conserve energy. Contrary to our prediction, we did not observe differential metabolic  
564 regulation or trade-off between the reproductive and locomotor muscles. Future studies

565 are needed to determine whether the muscle maintenance during the dry period is  
566 prioritized over that of other tissues and whether potential trade-offs exist between the  
567 support of the muscle capacity throughout the year and other fitness-related functions in  
568 desert frogs.

569

## 570 **Acknowledgements**

571 We are grateful to Assis, F. and Cassettari, B.O. for support in the fieldwork; and  
572 Ivanina, A.V. and Martins, A.N. for sharing their time, knowledge and expertise.

## 573 **Competing interests**

574 The authors declare no competing or financial interests.

## 575 **Author contributions**

576 I.S., C.B.M and F.R.G. conceived the study, designed the experiments and contributed  
577 substantially to interpreting the data. C.B.M and I.S. collected the data; C.B.M.  
578 analyzed the data; C.B.M, I.S. and F.R.G. wrote the manuscript, and take full  
579 responsibility for the content of the paper.

## 580 **Funding**

581 This research was supported by the State of São Paulo Science Foundation (FAPESP)  
582 through grant (2014/50643-8) led by F.R.G. and I.S. and PhD Fellowship for Research  
583 Internships Abroad (BEPE) awarded to C.B.M. (2015/02484-0).

584

## 585 **References**

586 1. Storey KB, Storey LM. Biochemical adaptation to extreme environments. In: Walz  
587 W. editor. Integrative Physiology: In the Proteomics and Post-Genomics Age. Humana  
588 Press Inc, Totowa. 2005. pp. 169–200.

589 2. Navas CA, Carvalho JE. Aestivation: Molecular and Physiological Aspects. Berlin;  
590 Heidelberg: Springer; 2010.

- 591 3. Storey KB, Storey JM. Metabolic regulation and gene expression during aestivation.  
592 In: Navas, CA, Carvalho JE, editors. Aestivation: Molecular and Physiological Aspects.  
593 Heidelberg, Germany: Springer; 2010. pp. 25–45.
- 594 4. Navas A, James RS, Wilson RS. Interindividual variation in the muscle physiology of  
595 vertebrate ectotherms: Consequences for behavioral and ecological performance. In: ed.  
596 Herrel A, Speck T, Rowe NP editors. Ecology and Biomechanics. United States: CRC  
597 Press Taylor & Francis Group. 2006; pp. 231-52.
- 598 5. James RS. Effects of aestivation on skeletal muscle performance. In: Navas, CA,  
599 Carvalho JE, editors. Aestivation: Molecular and Physiological Aspects. Heidelberg,  
600 Germany: Springer; 2010. pp. 171–81.
- 601 6. Hudson NJ, Franklin CE. Preservation of three-dimensional capillary structure in frog  
602 muscle during aestivation. *J Anat.* 2003; 202: 471-4.
- 603 7. Symonds BL, James RS, Franklin CE. Getting the jump on skeletal muscle disuse  
604 atrophy: preservation of contractile performance in aestivating *Cyclorana alboguttata*  
605 (Günther 1867). *J Exp Biol.* 2007; 210: 825–35.
- 606 8. Heldmaier G, Elvert R. How to enter torpor: Thermodynamic and physiological  
607 mechanisms of metabolic depression. In: Barnes BM, Carey HV, editors. Life in the  
608 Cold: Evolution, Mechanisms, Adaptation, and Application. Twelfth International  
609 Hibernation Symposium Biological Papers of the University of Alaska; 2004. vol. 27,  
610 pp. 185–98.
- 611 9. Cotton CJ. Skeletal muscle mass and composition during mammalian hibernation. *J*  
612 *Exp Biol.* 2016; 219: 226-34.
- 613 10. Abe AB. Estivation in South American amphibians and reptiles. *Braz J Med Biol*  
614 *Res.* 1995; 28: 1241-7.
- 615 11. Rodrigues MT. Herpetofauna da Caatinga. In: Leal IR, Tabarelli M, Silva JMC,  
616 editors. Ecologia e Conservação da Caatinga. Editora Universitária da UFPE; 2003. pp.  
617 181-236.
- 618 12. Carvalho JE, Navas CA, Pereira IC. Energy and Water in Aestivating Amphibians.  
619 In: Navas, CA, Carvalho JE, editors. Aestivation: Molecular and Physiological Aspects.  
620 Heidelberg, Germany: Springer; 2010. pp. 35-69.

- 621 13. Madelaire CB, Gomes FR. Breeding under unpredictable conditions: Annual  
622 variation in gonadal maturation, energetic reserves and plasma levels of androgens and  
623 corticosterone in anurans from the Brazilian semi-arid. *Gen Comp Endocrinol.* 2016;  
624 22(228): 9-16.
- 625 14. Madelaire CB, Sokolova I, Gomes FR. Seasonal Patterns of Variation in Steroid  
626 Plasma Levels and Immune Parameters in Anurans from Brazilian Semiarid Area.  
627 *Physiol Biochem Zool.* 2017; 90(4): 415–33.
- 628 15. Pough FH, Magnusson WE, Ryan MJ, Wells KD, Taigen TL. Behavioral energetics.  
629 In: Feder MM, Burggren WW, editors. *Environmental Physiology of Amphibians.*  
630 University of Chicago Press, Chicago; 1992. pp. 395–436.
- 631 16. Sullivan BK, Ryan MJ, Verrell PA. Female choice and mating system structure. In:  
632 Heatwole H, Sullivan BK, editors. *Amphibian biology.* vol. 2: social behavior. Surrey  
633 Beatty; 1995. pp. 469-517.
- 634 17. Melichna J, Gutmann E, Herbrychova A, Stichova J. Sexual dimorphism in  
635 contraction properties and fibre pattern of the flexor carpi radialis muscle of the frog  
636 (*Rana temporaria* L.). *Aust Vet J.* 1972; 48: 89–91.
- 637 18. Astley HC, Roberts, TJ. Evidence for a vertebrate catapult: elastic energy storage in  
638 the plantaris tendon during frog jumping. *Biol Lett.* 2012; 8: 386–9.
- 639 19. Boutilier RG, St-Pierre J. Adaptive plasticity of skeletal muscle energetics in  
640 hibernating frogs: mitochondrial proton leak during metabolic depression. *J Exp Biol.*  
641 2002; 205: 2287–96.
- 642 20. Hardewig I, van Dijk PLM, Moyes CD, Pörtner HO. Temperature-dependent  
643 expression of cytochrome-c oxidase in Antarctic and temperate fish. *Am J Physiol*  
644 *Regul Integr Comp Physiol.* 1999; 277 (2): R508-16.
- 645 21. Hue L, Rider MH. The AMP-activated protein kinase: more than an energy sensor.  
646 *Essays Biochem.* 2007; 43: 121–37.
- 647 22. Hardie DG. AMP-activated protein kinase: an energy sensor that regulates all  
648 aspects of cell function. *Genes Dev.* 2011; 25: 1895–1908.
- 649 23. Brazil DP, Yang ZZ, Hemmings BA. Advances in protein kinase B signalling:  
650 AKTion on multiple fronts. *Trends Biochem. Sci.* 2004; 29: 233–42.



- 651 24. Holcik M, Sonenberg N. Translational control in stress and apoptosis. *Nat Rev Mol*  
652 *Cell Biol.* 2005; 6(4): 318-27.
- 653 25. Sørensen JG, Kristensen TN, Loeschke V. The evolutionary and ecological role of  
654 heat shock proteins. *Ecol Lett.* 2003; 6: 1025–37.
- 655 26. Kuznetsov AV, Kunz WS, Saks V, Usson Y, Mazat J, et al. Cryopreservation of  
656 mitochondria and mitochondrial function in cardiac and skeletal muscle fibers. *Anal*  
657 *Biochem.* 2003; 319: 296–303.
- 658 27. Kuznetsov AV, Gnaiger E. Oxygraph assay of cytochrome c oxidase activity:  
659 chemical background correction. *Mitochondr Physiol Netw.* 2010; 06(06): 1–4.
- 660 28. Manning BD, Cantley LC. AKT/PKB Signaling: Navigating Downstream. *Cell.*  
661 2007; 129(7): 1261-74.
- 662 29. Hoehn KL, Hudachek SF., Summers SA, Florant GL. Seasonal, tissue-specific  
663 regulation of Akt/protein kinase B and glycogen synthase in hibernators. *Am J Physiol*  
664 *Regul Integr Comp Physiol* 2004; 286: R498–R504.
- 665 30. Ramnanan CJ, Groom AG, Storey KB. Akt and its downstream targets play key  
666 roles in mediating dormancy in land snails. *Comp Biochem Physiol Part B.* 2007; 148:  
667 245–55.
- 668 31. Zhang J, Storey KB. Akt signaling and freezing survival in the wood frog, *Rana*  
669 *sylvatica*. *Biochim Biophys Acta.* 2013; 1830: 4828–37.
- 670 32. Datta SR, Brunet A, Greenberg ME. Cellular survival: a play in three Akts. *Genes*  
671 *Dev.* 1999; 13: 2905–27.
- 672 33. Zhang J, Storey KB. Cell cycle regulation in the freeze tolerant wood frog, *Rana*  
673 *sylvatica*. *Cell Cycle.* 2012; 11: 1727-42.
- 674 34. Gerber VEM, Groom AG, Storey KB. Anti-apoptotic response during anoxia and  
675 recovery in a freeze-tolerant wood frog (*Rana sylvatica*). *Peer J.* 2016; 24: 4:e1834.
- 676 35. Burgering BM, Medema RH. Decisions on life and death: FOXO Forkhead  
677 transcription factors are in command when PKB/Akt is off duty. *J Leukoc Biol.* 2003;  
678 73: 689–701.

- 679 36. Rajesh K, Krishnamoorthy J, Kazimierczak U, Tenkerian C, Papadakis AI, et al.  
680 Phosphorylation of the translation initiation factor eIF2 $\alpha$  at serine 51 determines the cell  
681 fate decisions of Akt in response to oxidative stress. *Cell Death Dis.* 2015; 6: e1591.
- 682 37. Hershey JW. Protein phosphorylation controls translation rates. *J Biol Chem.* 1989;  
683 264(35): 20823-6.
- 684 38. Pakay JL, Hobbs AA, Kiball SR, Guppy M. The role of eukaryotic initiation factor  
685 2 $\alpha$  during the metabolic depression associated with estivation. *J Exp Biol.* 2003;  
686 206: 2363–71.
- 687 39. Storey KB, Storey J. Aestivation: signaling and hypometabolism. *J Exp Biol.* 2012;  
688 215: 1425-33.
- 689 40. Fuery CJ, Withers, PC, Hobbs AA, Guppy M. The role of protein synthesis during  
690 metabolic depression in the Australian desert frog *Neobatrachus centralis*. *Comp*  
691 *Biochem Physiol A.* 1998; 119(2): 469–76.
- 692 41. Pakay JL, Withers PC, Hobbs AA, Guppy M. In vivo downregulation of protein  
693 synthesis in the snail *Helix apersa* during estivation. *Am J Physiol Regul Integr Comp*  
694 *Physiol.* 2002; 283(1): R197-R204.
- 695 42. Ramnanan CJ, Allan ME, Groom, AG, Storey KB. Regulation of global protein  
696 translation and protein degradation in aerobic dormancy. *Mol Cell Biochem.* 2009; 323:  
697 9-20.
- 698 43. Zhang J, Tessier SN, Biggar KK, Wu C, Pifferi F, et al. Regulation of torpor in the  
699 gray mouse lemur: transcriptional and translational controls and role of AMPk  
700 signaling. *GPB.* 2015; 13(2): 103–10.
- 701 44. Rider MH. Role of AMP-activated protein kinase in metabolic depression in  
702 animals. *J Comp Physiol B.* 2016; 186: 1–16.
- 703 45. Bartrons M, Ortega E, Obach M, Calvo MN, Navarro-Sabate A, et al. Activation of  
704 AMP-dependent protein kinase by hypoxia and hypothermia in the liver of frog *Rana*  
705 *perezi*. *Cryobiology.* 2004; 49: 190–4.
- 706 46. Rider MH, Hussain N, Horman S, Dilworth SM, Storey KB. Stress-induced  
707 activation of the AMP-activated protein kinase in the freeze-tolerant frog *Rana*  
708 *sylvatica*. *Cryobiology.* 2006; 53: 297–309.

- 709 47. Kahn BB, Alquier T, Carling D, Hardie DG. AMP-activated protein kinase: ancient  
710 energy gauge provides clues to modern understanding of metabolism. *Cell Metab.* 2005;  
711 1: 15–25.
- 712 48. Wells KD. The energetics of calling in frogs. In: Ryan MJ, editor. *Anuran*  
713 *Communication*. Smithsonian Institution Press, Washington and London; 2001. pp.  
714 45–60.
- 715 49. Winder WW, Hardie DG. Inactivation of acetyl-CoA carboxylase and activation of  
716 AMP-activated protein kinase in muscle during exercise. *Am J Physiol.* 1996; 270:  
717 E299–E304.
- 718 50. Hardie DG. AMP-activated/SNF1 protein kinases: conserved guardians of cellular  
719 energy. *Nat Rev Mol Cell Biol.* 2007; 8: 774–85.
- 720 51. van Bocxlaer I, Loader SP, Roelants K, Biju SD, Menegon M, et al. Gradual  
721 adaptation toward a range-expansion phenotype initiated the global radiation of toads.  
722 *Science.* 2010; 327: 679–82.
- 723 52. Storey KB, Storey JM. Metabolic rate depression in animals: transcriptional and  
724 translational controls. *Biol Rev.* 2004; 79(01): 207-33.
- 725 53. Reuner A, Brümmer F, Schill RO. Heat shock proteins (Hsp70) and water content in  
726 the estivating Mediterranean Grunt Snail (*Cantareus apertus*). *J Comp Biochem Physiol*  
727 *Part B.* 2008; 151: 28–31.
- 728 54. Mizrahi T, Heller J, Goldenberg S, Arad Z. Heat shock proteins and survival  
729 strategies in congeneric land snails (Sphincterochila) from different habitats. *Cell Stress*  
730 *Chaperones.* 2012; 17: 523–27.
- 731 55. Arad Z, Mizrahi T, Goldenberg S, Heller J. Natural annual cycle of heat shock  
732 proteins expression in land snails: desert vs Mediterranean species of Sphincterochila. *J*  
733 *Exp Biol.* 2010; 213: 3487–95.
- 734 56. Kregel KC. Heat shock proteins: modifying factors in physiological stress responses  
735 and acquired thermotolerance. *J Appl Physiol.* 2010; 92: 2177–86.
- 736 57. Storey KB, Storey J. Heat shock proteins and hypometabolism: adaptive strategy for  
737 proteome preservation. *Res Rep Biol.* 2011; 2: 57-68.

- 738 58. Evgen'ev MB, Garbuz DG, Zatssepina OG. Molecular Functions of Heat Shock  
739 Proteins. In: Evgen'ev MB, Garbu DG, Zatssepina OG, editors. Heat Shock Proteins and  
740 Whole Body Adaptation to Extreme Environments. Springer Netherlands; 2014. pp. 11-  
741 34.
- 742 59. Bevier CR. Utilization of energy substrates during calling activity in tropical frogs.  
743 Behav Ecol Sociobiol. 1997; 41: 343–52.
- 744 60. Emerson SB. Male advertisement calls: behavioral variation and physiological  
745 responses. In: Ryan MJ, editor. Anuran Communication. Smithsonian Institution Press,  
746 Washington; 2001. pp. 36–44.
- 747 65. Moore FL, Boydb SK, Kelley DB. Historical perspective: hormonal regulation of  
748 behaviors in amphibians. Horm Behav. 2005; 48: 373–83.
- 749 66. Assis VR, Navas CA, Mendonça MT, Gomes FR. Vocal and territorial behavior in  
750 the Smith frog (*Hypsiboas faber*): relationships with plasma levels of corticosterone and  
751 testosterone. Comp Biochem Physiol. A. 2012; 163: 265–71.
- 752 67. Carr JA. Stress and reproduction in amphibians. In: Norris DO, Lopez KH, editors.  
753 Hormones and Reproduction of Vertebrates, vol. 2, Amphibians. Academic Press, San  
754 Diego; 2011. pp. 99– 116.
- 755 68. Pratt WB, Toft DO. Steroid receptor interactions with heat shock proteins and  
756 immunophilin chaperones. Endocr Rev. 1997; 18: 306-60.
- 757 69. Falkenstein E, Tillmann HC, Christ M, Feuring M, Wehling M. Multiple actions of  
758 steroid hormones: a focus on rapid, nongenomic effects. Pharmacol Rev. 2000; 52: 513-  
759 56.
- 760 70. Sapolsky RM, Romero M, Munck AU. How do glucocorticoids influence stress  
761 responses? Integrating permissive, suppressive, stimulatory, and preparative actions.  
762 Endocr Rev. 2000; 21:55–89.

763

## 764 **Supporting information**

765 **Fig S1. AMPK expression during (A) reproductive and (B) dry period for *R. jimi*,**  
766 **AKT expression during (C) reproductive period for *R. jimi*; Total eIF2 $\alpha$  expression**

767 **during (D) reproductive and (E) dry period for *P. diplolister*; Phosphorylated**  
768 **eIF2 $\alpha$  expression during (F) reproductive and (G) dry period for *R. jimi*; HSP60**  
769 **expression during (H) reproductive and (I) dry period for *R. jimi*; HSP70**  
770 **expression during (J) reproductive period for *R. jimi*; and HSP90 expression**  
771 **during (K) reproductive period for *R. jimi*.**

772 **Fig S2. Relative intensity of AMPK protein levels among different muscles in *P.***  
773 ***diplolister* during reproductive period. Data are means  $\pm$  S.E.M., n = 7–10. ND**  
774 **indicates not determined because of the lack of samples. Different letters indicates**  
775 **significant difference (P < 0.05).**

776 **Fig S3. Relative intensity of eIF2 $\alpha$  protein levels among different muscles in *R.***  
777 ***granulosa* during (A) reproductive and (B) dry period and *R. jimi* during (C)**  
778 **reproductive period; phosphorylate eIF2 $\alpha$  among different muscles in *P. diplolister***  
779 **during (D) dry period; and phosphorylate eIF2 $\alpha$ /eIF2 $\alpha$  ratio among different**  
780 **muscles in *R. jimi* during (E) reproductive period. Data are means  $\pm$  S.E.M., n = 3–**  
781 **10, except when otherwise indicated. Asterisks and different letters indicates significant**  
782 **difference (P < 0.05).**

783 **Fig S4. Relative intensity of HSP 60 protein levels among different muscles in *R.***  
784 ***jimi* during (A) reproductive and (B) dry period and in *R. granulosa* during (C)**  
785 **reproductive period; HSP 70 protein levels in *R. jimi* during (D) reproductive**  
786 **period; and HSP 90 in *R. jimi* during (E) reproductive period and in *P. diplolister***  
787 **during (F) reproductive period. Data are means  $\pm$  S.E.M., n = 4–8, except when**  
788 **otherwise indicated. ND indicates not determined because of the lack of samples.**  
789 **Asterisks and different letters indicates significant difference (P < 0.05).**

790

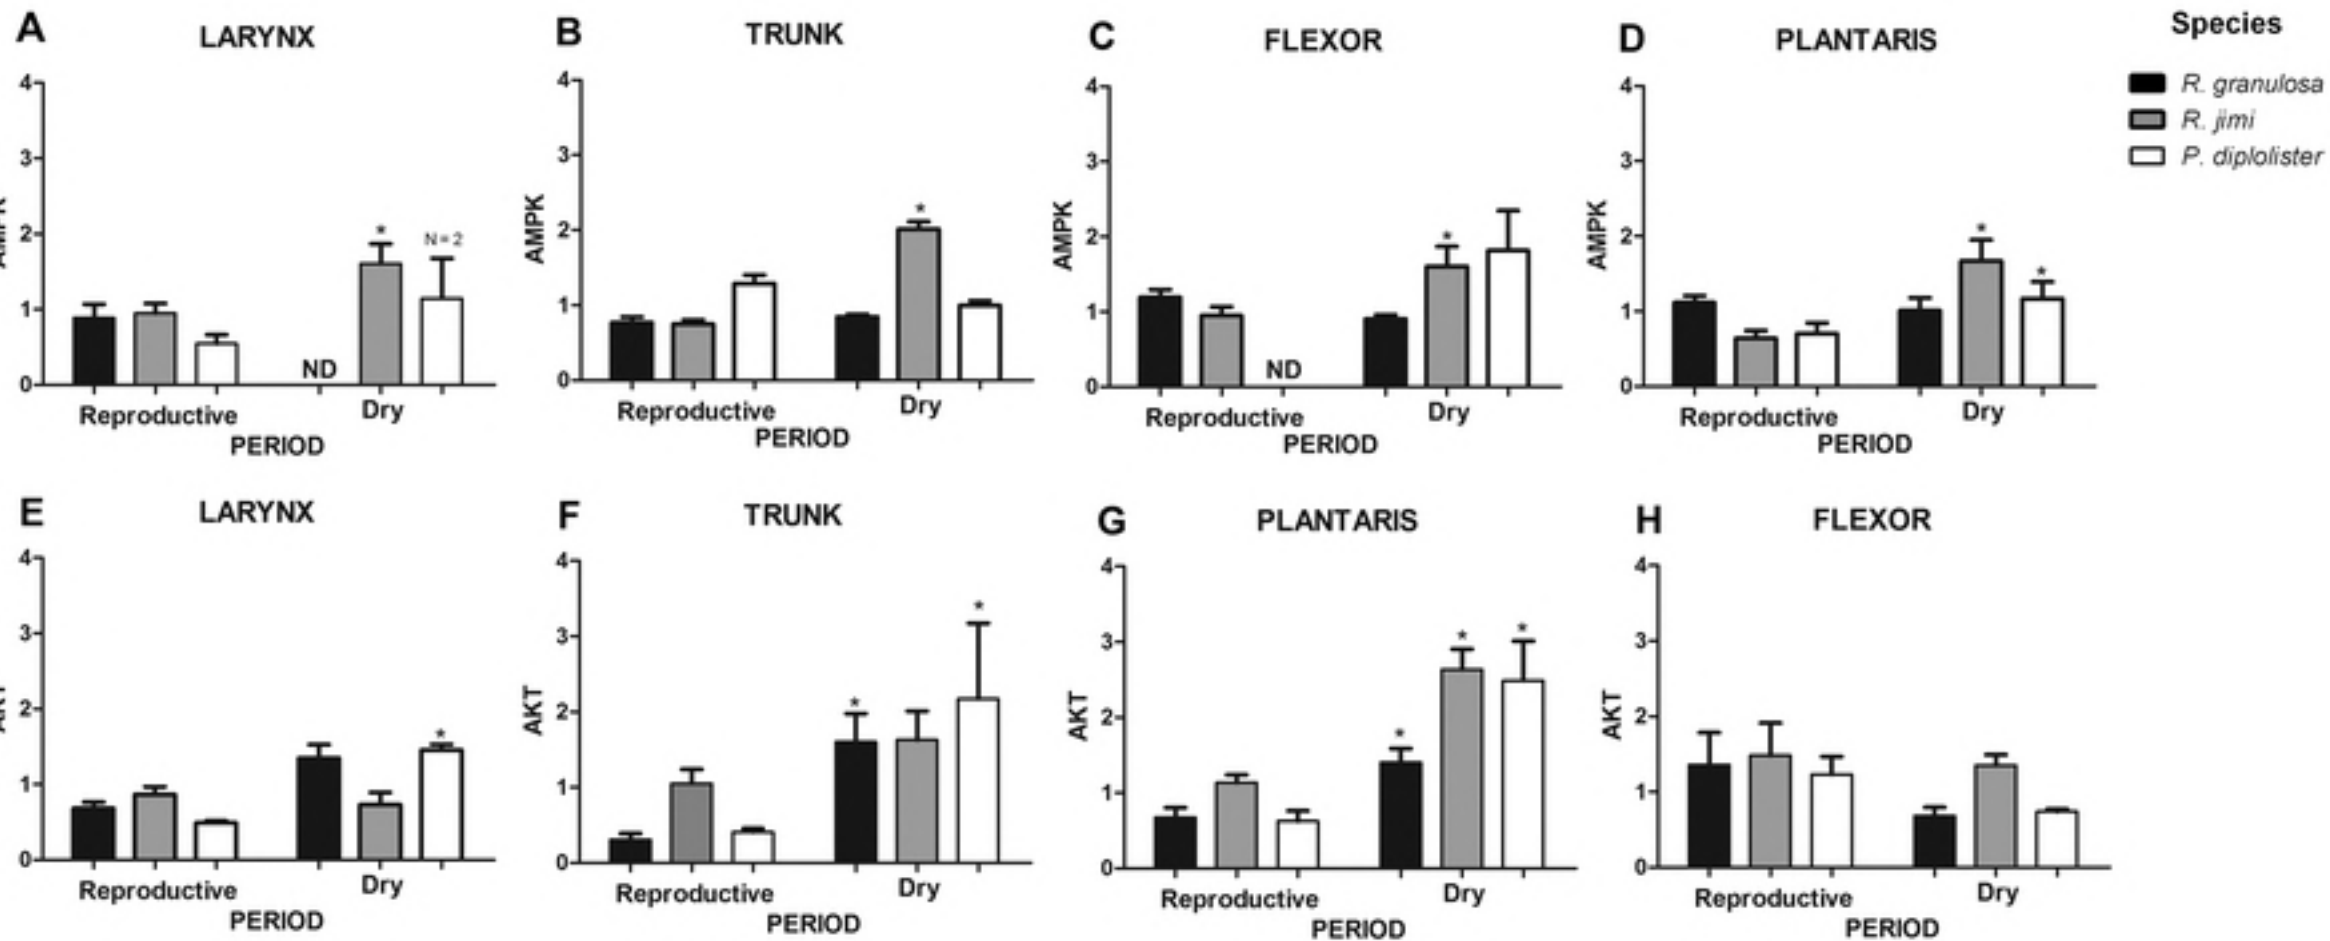





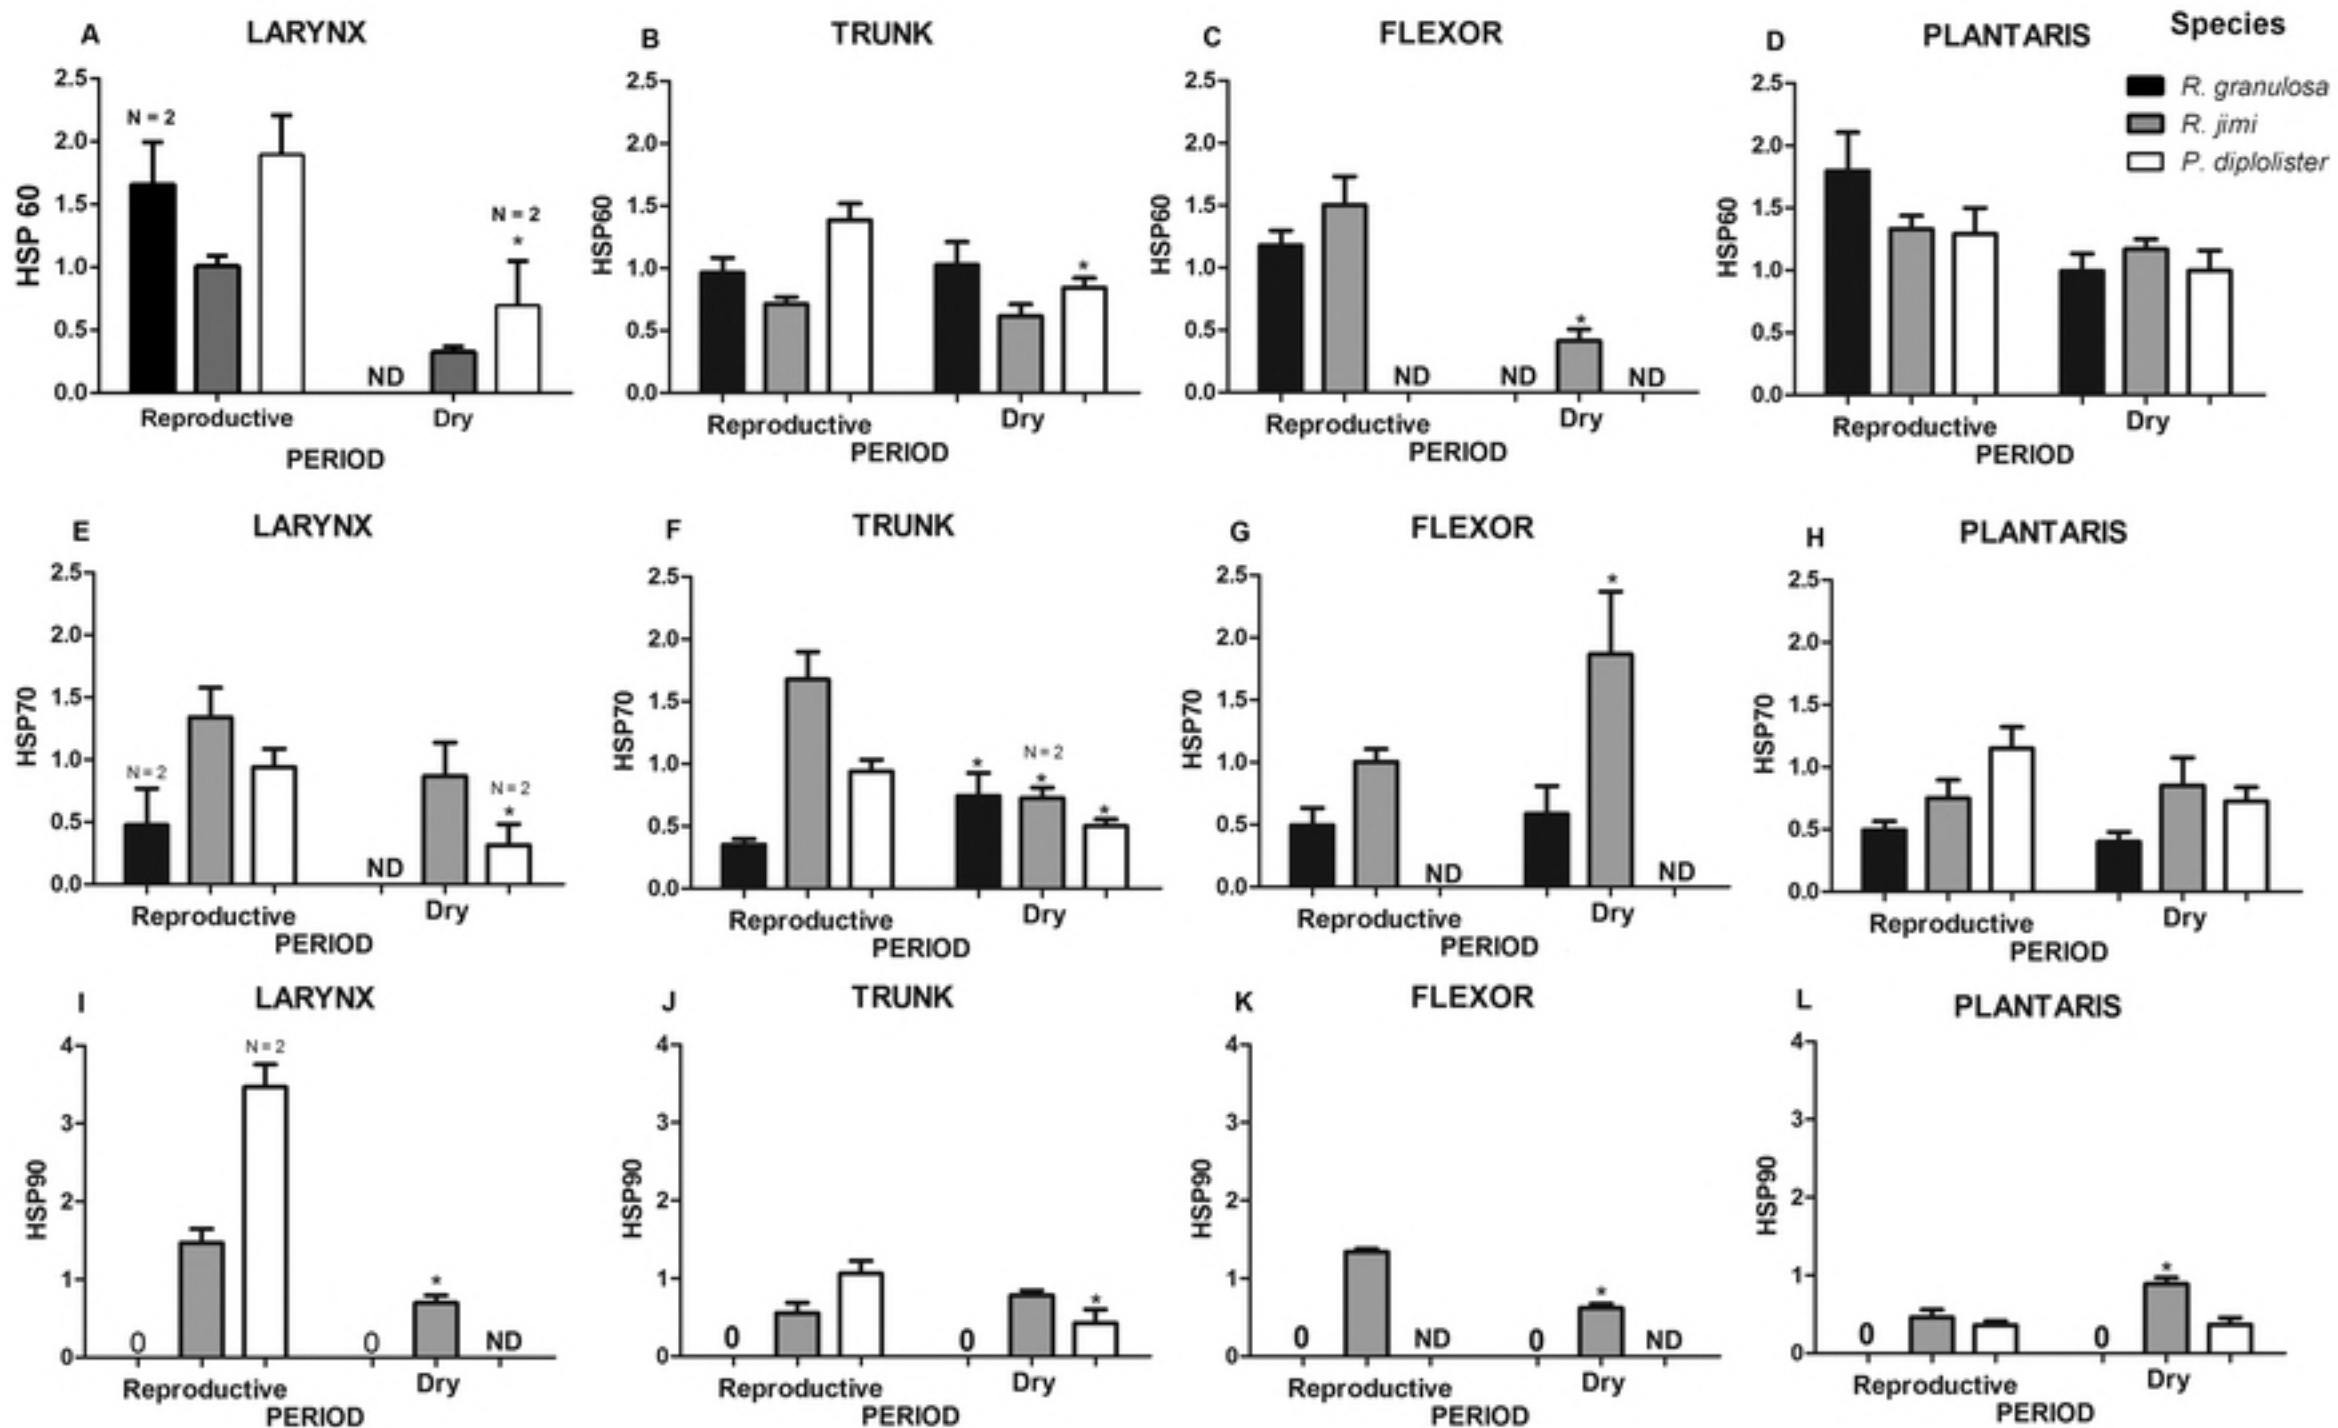

## Species

- *R. granulosa*
- *R. jimi*
- *P. diplolister*

## B PLANTARIS

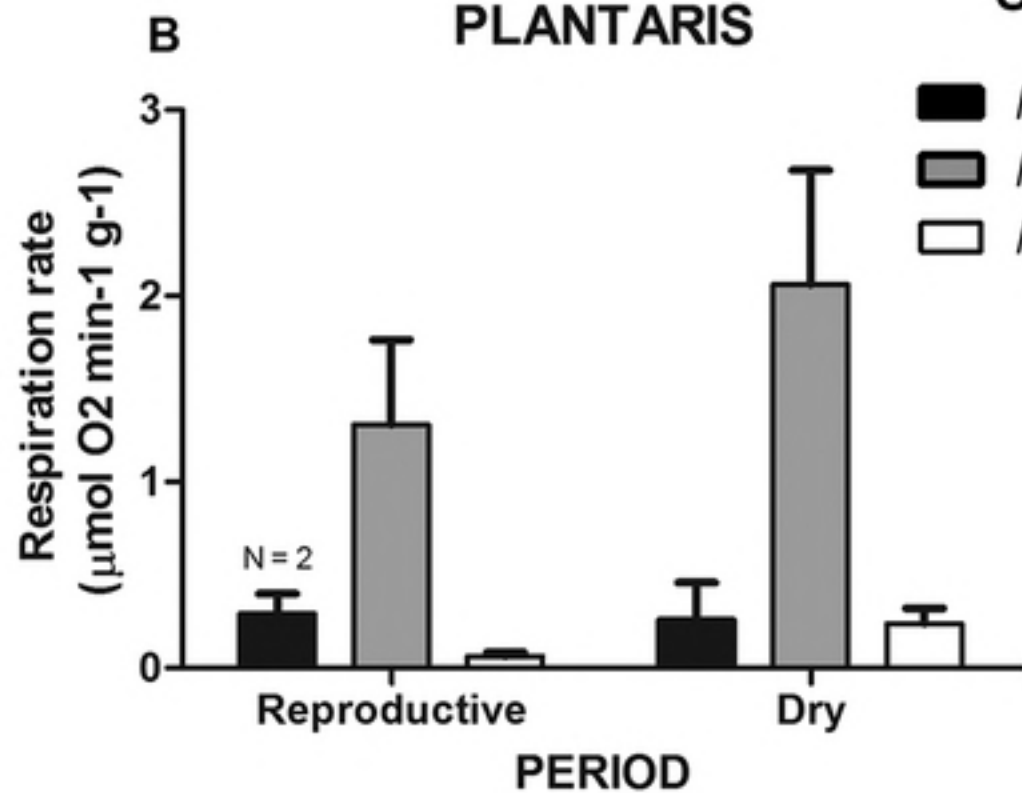

## A TRUNK

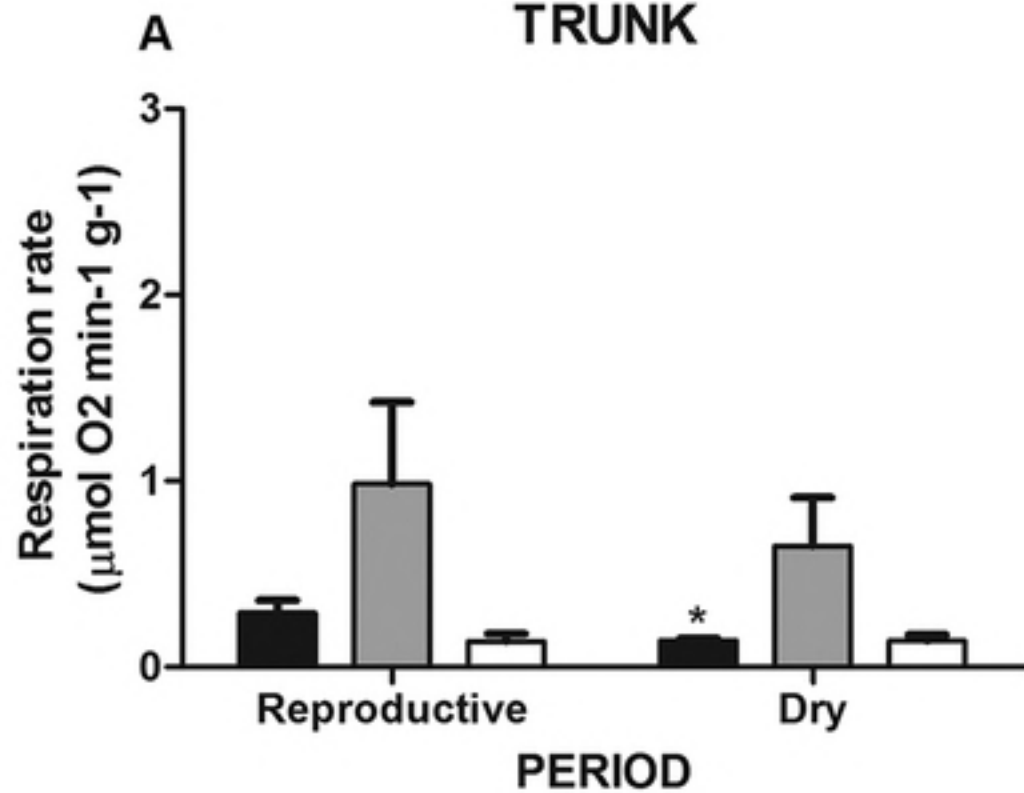

Source: https://www.biorxiv.org/content/10.1101/394544v1.full.pdf
